# Supplementary material for: Repositioning of Ertiprotafib via Supramolecular Assembly Enables Biomarker-Guided Therapy for Acute Kidney Injury
Source: Research Square preprint supplement (doi:10.21203/rs.3.rs-8283086/v1), 2025-12-22
Supplement: Supplementary file 1 [file bbd175e57ea24e6b8ca7bdd9.docx]

Supplementary Materials for

**Repositioning of Ertiprotafib via Supramolecular Assembly Enables Biomarker-Guided Therapy for Acute Kidney Injury**

Hochung Jang, Dongwon Shin, Byeongmin Park, Jae-Hyeon Lee, Youngri Ryu, Junha Lee, Eunbyeol Ko, Yoon Sook Ko, Hee Young Lee, Young Eun Choi, Se Won Oh, Sang-Kyung Jo, Sangmine Lee, Jooho Park, Kwangmeyung Kim, Sun Hwa Kim, Myung-Gyu Kim, Yoosoo Yang, Man Kyu Shim

*Correspondence to:

Man Kyu Shim (E-mail: mks@kist.re.kr), Yoosoo Yang (E-mail: yangys@skku.edu),
Myung-Gyu Kim (E-mail: gyu219@hanmail.net) and Sun Hwa Kim (E-mail: sunkim@kist.re.kr).

**This file includes:**

Supplementary Figures 1-12


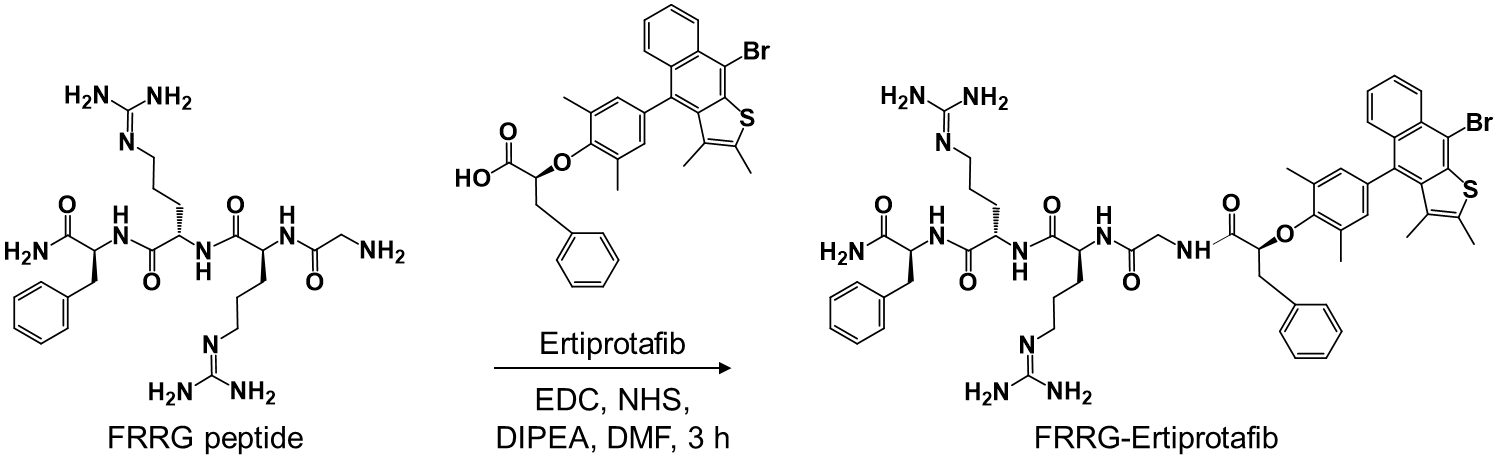


**Supplementary Figure 1.** Synthetic scheme of the ertiprotafib prodrug composing SENs.


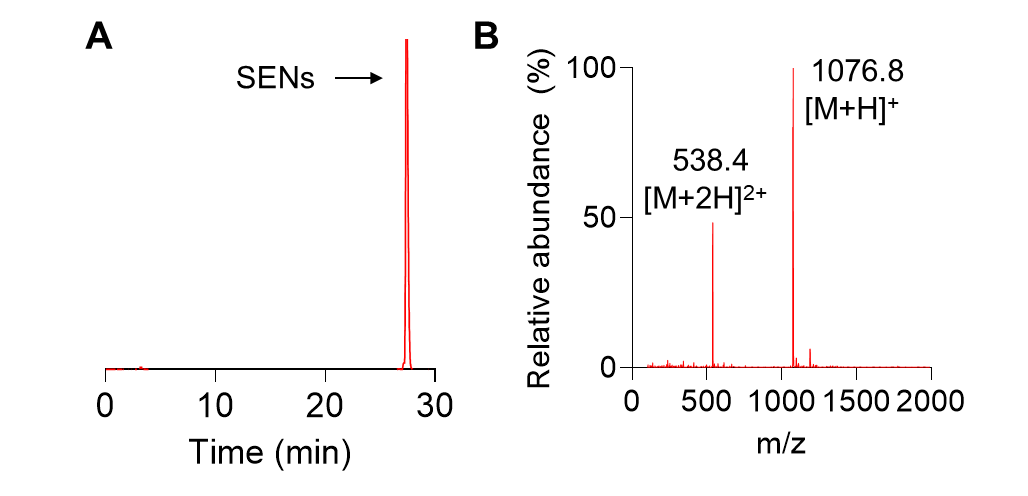


**Supplementary Figure 2.** **(A)** HPLC spectrum (purity) and **(B)** mass spectra (calculated for C54H64BrN11O6S, found: 1076.8 m/z [M+H]+ and 538.4 m/z [M+2H]2+) of ertiprotafib prodrug.

**
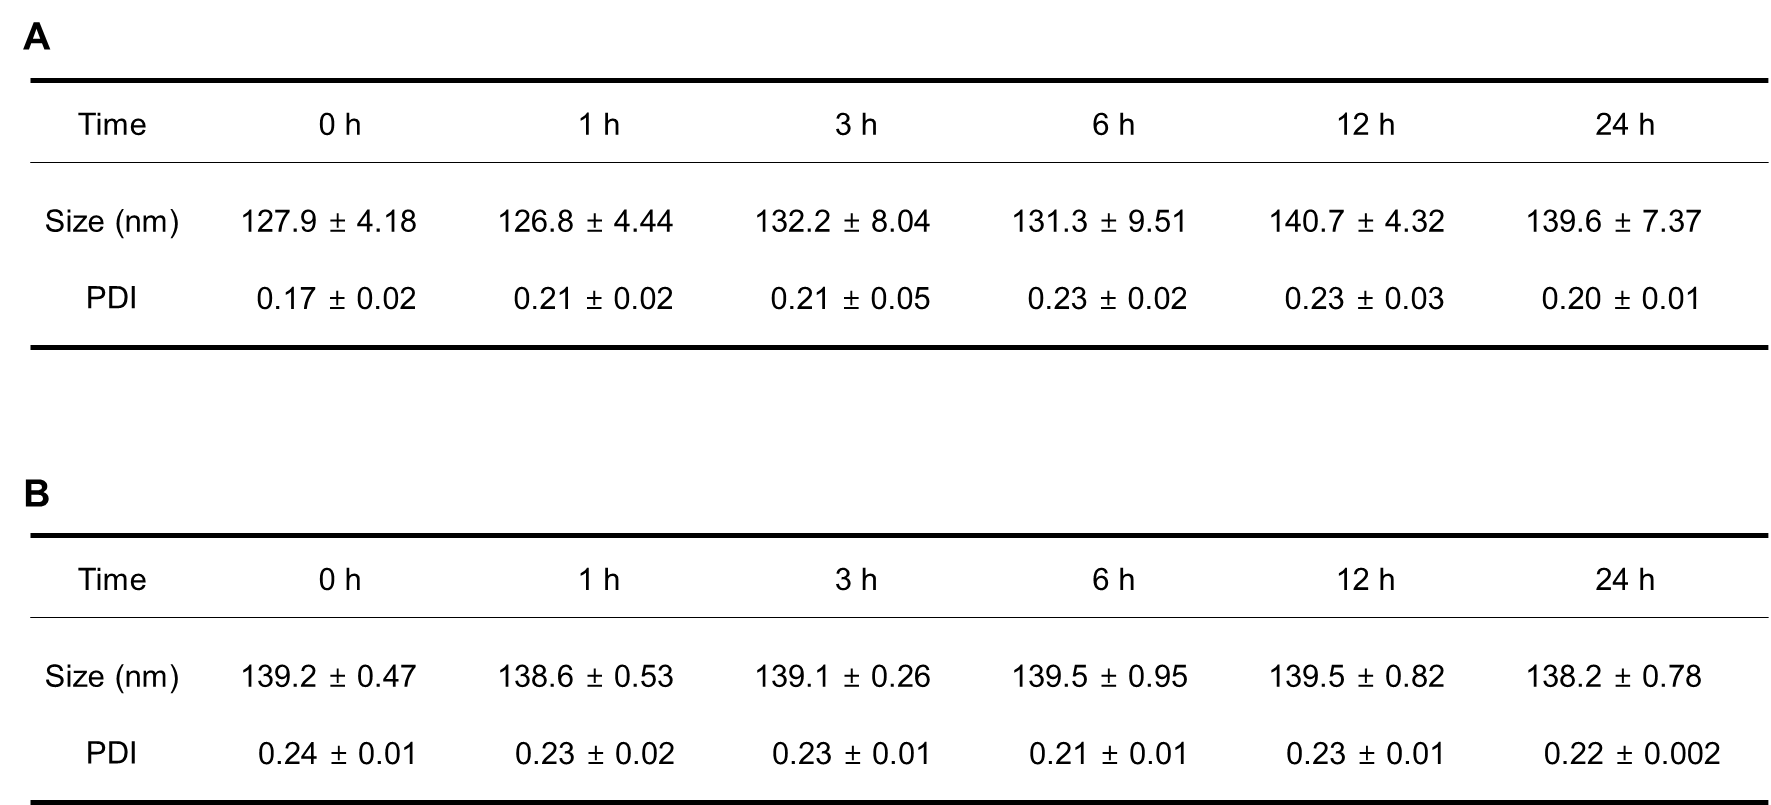
**

**Supplementary Figure 3.** Detailed information on the average size and polydispersity index (PDI) of SENs during time-dependent incubation in **(A)** PBS and **(B)** mouse serum (n=3).

**Supplementary Figure 4.** Classification of major intermolecular interactions observed at 300 ns of simulation time.

**Supplementary Figure 5.** Quantitative data of cellular uptake of SENs in HK-2 cells. MFI data are presented as mean ± SD.


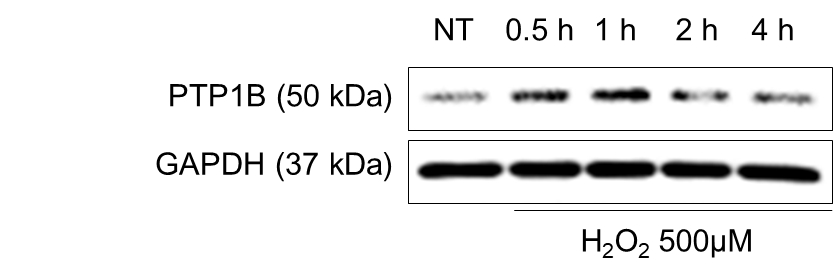


**Supplementary Figure 6.** PTP1B expression in HK-2 cells before and after incubation with H2O2.


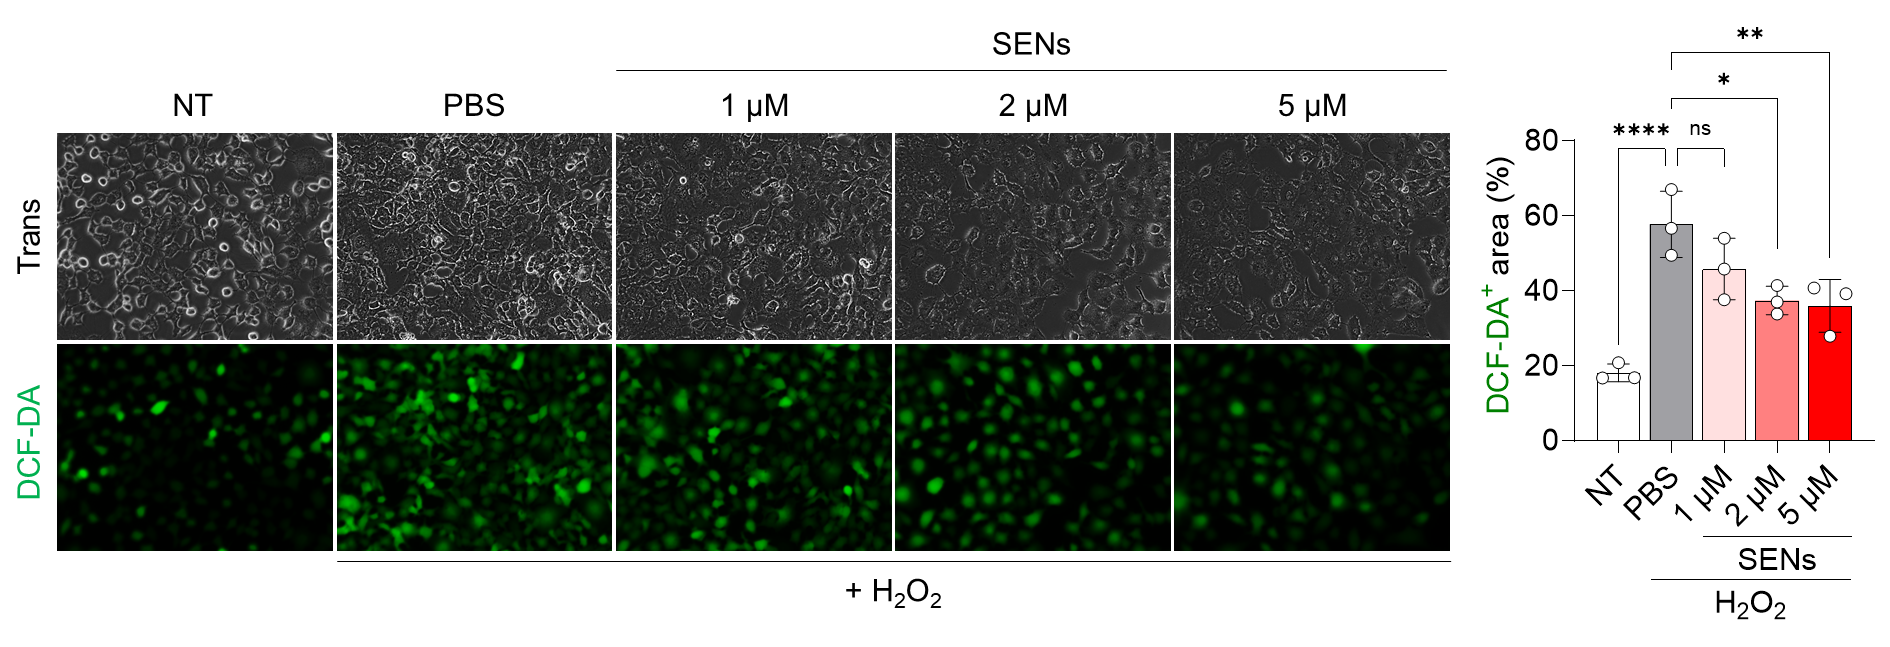


**Supplementary Figure 7.** Intracellular ROS in H2O2-treated tubular cells following incubation with varying concentrations of SENs. DCF-DA-positive areas are represented as mean ± SEM.

**
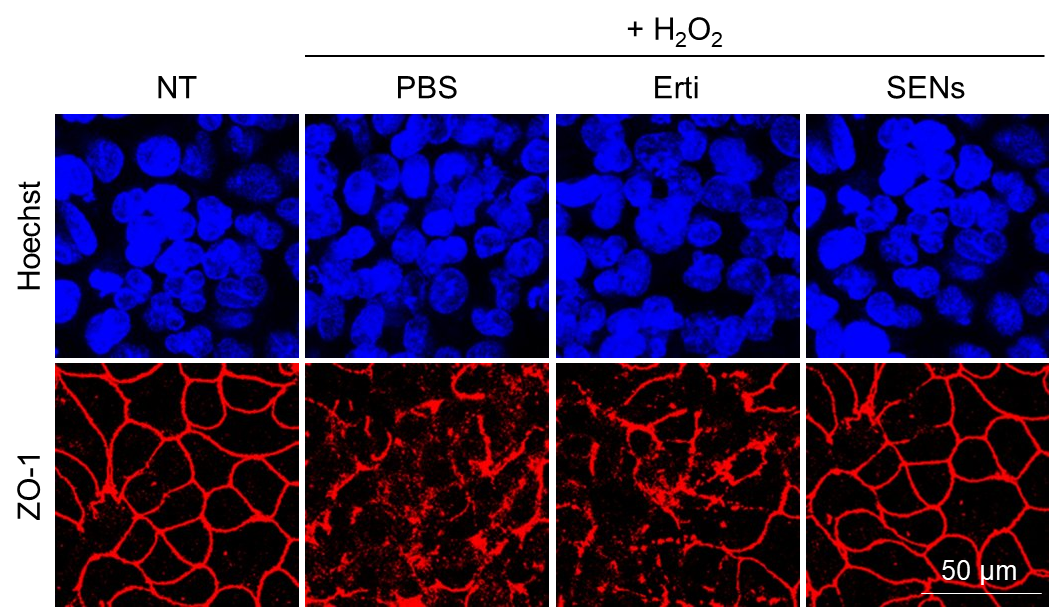
**

**Supplementary Figure 8.** Channel images of representative CLSM images showing expression of the tight junction marker ZO-1 in H2O2-treated tubular cells following incubation with SENs or ertiprotafib.


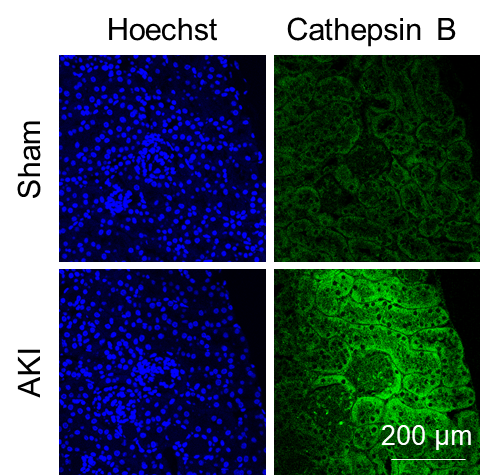


**Supplementary Figure 9.** Channel images of representative CLSM images showing expression of cathepsin B in renal tissues from healthy and AKI mice.


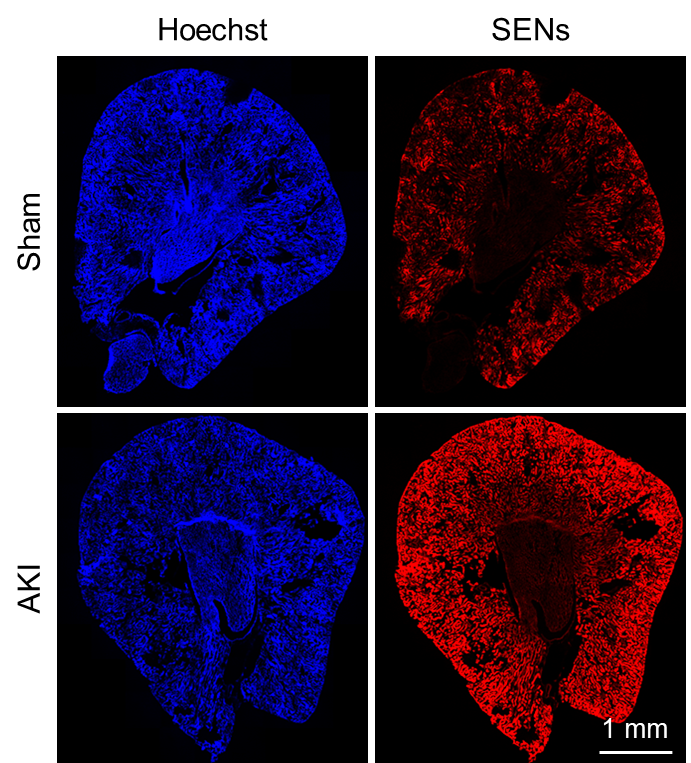


**Supplementary Figure 10.** Channel images of representative CLSM images showing renal tissues from healthy and AKI mice treated with SENs.


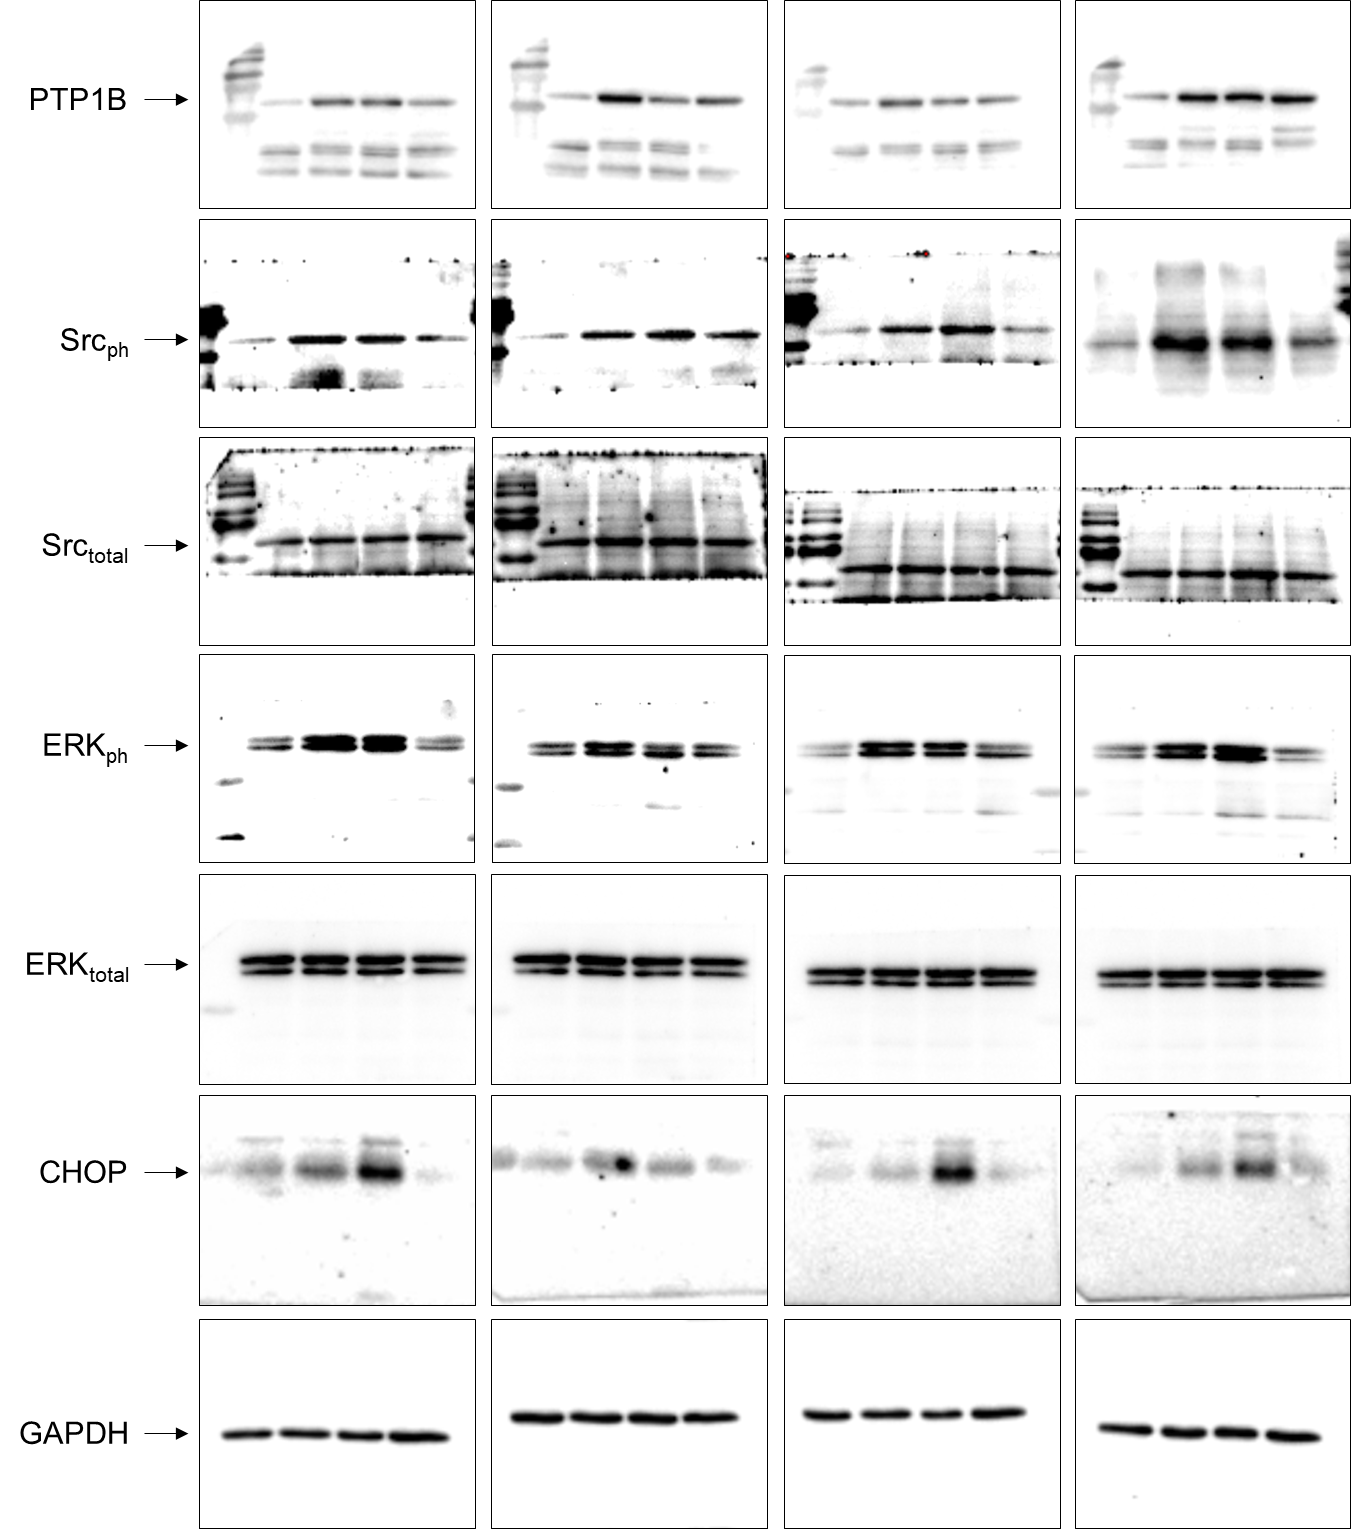


**Supplementary Figure 11.** Uncropped western blot data corresponding to **Figure 5C**.


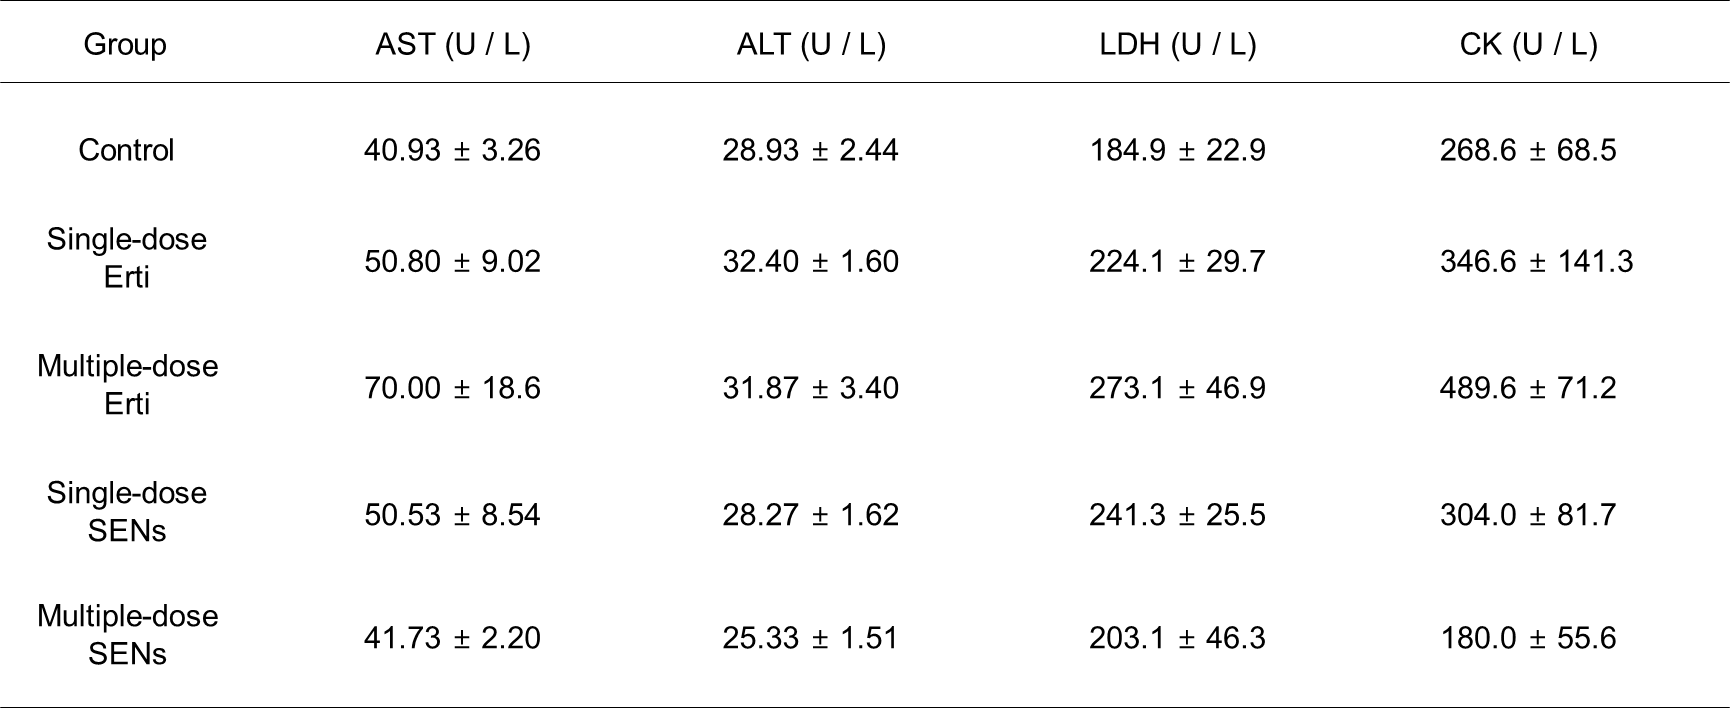


**Supplementary Figure 12.** Detail information on hematological parameters.
